# Supplementary material for: Physical Heterogeneity Increases Biofilm Resource Use and Its Molecular Diversity in Stream Mesocosms
Source: PubMed Central journal article supplement (PMC2848676; doi:10.1371/journal.pone.0009988), 2010-04-01
Supplement: pone.0009988.s001.pdf [file pone.0009988.s001.pdf]

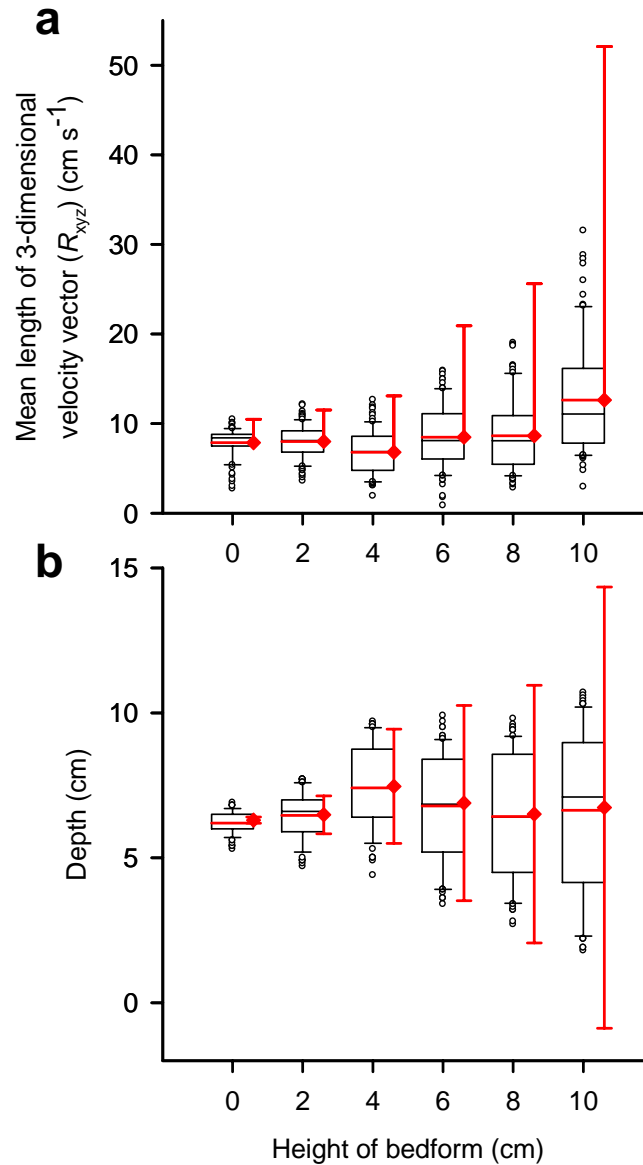

**Figure S1. Descriptive statistics of depth and velocity across the flow heterogeneity gradient.** Bedforms of 6 different heights create landscapes of increasing flow heterogeneity, i.e. spatial variance of environmental key variables describing hydrodynamic conditions, while holding mean conditions constant across the gradient. **(a)** Height of bedform versus mean length of 3-dimensional velocity vector ( $R_{xyz}$ ), and **(b)** height of bedform versus depth above bedform. Black lines represent median, boxes delimit 25 and 75 % percentiles, whiskers give 10 and 90 % percentiles, dots are measurements outside the central 90 % region; red line and error bar represent arithmetic mean and variance (a) or standard deviation (b); sample size  $n=80$  measurements distributed regularly over 1 entire bedform of 1 m (each a time series of 3000 data points in case of velocity) per flume.
