# Supplementary material for: Physical Heterogeneity Increases Biofilm Resource Use and Its Molecular Diversity in Stream Mesocosms
Source: PubMed Central journal article supplement (PMC2848676; doi:10.1371/journal.pone.0009988), 2010-04-01
Supplement: pone.0009988.s005.pdf [file pone.0009988.s005.pdf]

**Table S1: Characterization of the hydrodynamic conditions over the control streambed and the bedforms of the landscapes increasing in flow heterogeneity.**  $R_{xyz}$ ... mean length of 3D velocity vector, TKE...turbulent kinetic energy, TI...turbulence intensity; given are mean values  $\pm$  standard deviation for average and spatial variation of hydrodynamic conditions ( $n = 80$  for each flume, except slope and flume-scale velocity).

|                                              | Height of bedforms in the mesocosms – flow heterogeneity treatment |                 |                 |                 |                 |                 |
|----------------------------------------------|--------------------------------------------------------------------|-----------------|-----------------|-----------------|-----------------|-----------------|
|                                              | no bedforms                                                        | 2 cm            | 4 cm            | 6 cm            | 8 cm            | 10 cm           |
| Slope (‰)                                    | 0.1                                                                | 0.1             | 0.5             | 1.25            | 2.0             | 3.0             |
| $R_{xyz}$ (cm s <sup>-1</sup> ) <sup>▲</sup> | 7.9 $\pm$ 1.6                                                      | 8.0 $\pm$ 1.9   | 6.8 $\pm$ 2.5   | 8.5 $\pm$ 3.5   | 8.6 $\pm$ 4.1   | 12.6 $\pm$ 6.3  |
| Depth (cm) <sup>▲</sup>                      | -6.3 $\pm$ 0.3                                                     | -6.5 $\pm$ 0.8  | -7.5 $\pm$ 1.4  | -6.9 $\pm$ 1.8  | -6.5 $\pm$ 2.1  | -6.7 $\pm$ 2.8  |
| TKE (J) <sup>▲</sup>                         | 2.0 $\pm$ 0.6                                                      | 2.0 $\pm$ 0.9   | 1.7 $\pm$ 1.0   | 2.7 $\pm$ 1.9   | 2.6 $\pm$ 2.0   | 6.6 $\pm$ 7.1   |
| TI (%) <sup>▲</sup>                          | 41.9 $\pm$ 32.5                                                    | 41.8 $\pm$ 38.7 | 48.6 $\pm$ 43.7 | 50.0 $\pm$ 42.7 | 50.1 $\pm$ 44.6 | 50.2 $\pm$ 41.1 |
| Velocity <sup>□</sup>                        | 7.63 $\pm$ 0.31                                                    | 7.77 $\pm$ 0.36 | 7.77 $\pm$ 0.34 | 7.53 $\pm$ 0.40 | 7.67 $\pm$ 0.38 | 7.16 $\pm$ 0.42 |

<sup>▲</sup> derived from acoustic Doppler velocimetry,  $n = 80$  measurements regularly distributed over one entire bedform.

<sup>□</sup> flume-scale mean velocity calculated from nominal travel time of conservative tracer NaCl,  $n = 12-16$  injections per flume.
