# Supplementary material for: Physical Heterogeneity Increases Biofilm Resource Use and Its Molecular Diversity in Stream Mesocosms
Source: PubMed Central journal article supplement (PMC2848676; doi:10.1371/journal.pone.0009988), 2010-04-01
Supplement: pone.0009988.s006.pdf [file pone.0009988.s006.pdf]

**Table S2. Water-related environmental background conditions (nutrient concentrations, DOC concentrations and temperature) measured at the outlet of mesocosms and in the header tank.** Given are means  $\pm$  standard deviation and sample size n. Concentrations of inorganic nutrients and dissolved organic carbon were measured twice a week, temperature was recorded continuously. Concentrations of PO<sub>4</sub>-P were mostly below detection limits ( $< 3 \mu\text{g l}^{-1}$ ) and are not reported.

|                                             | header tank                         | Height of bedforms in the mesocosms – heterogeneity treatment |                                     |                                     |                                     |                                     |                                     |
|---------------------------------------------|-------------------------------------|---------------------------------------------------------------|-------------------------------------|-------------------------------------|-------------------------------------|-------------------------------------|-------------------------------------|
|                                             |                                     | no bedforms                                                   | 2 cm                                | 4 cm                                | 6 cm                                | 8 cm                                | 10 cm                               |
| NO <sub>3</sub> -N (mg l <sup>-1</sup> )    | <b>0.57</b><br>$\pm 0.24$<br>(n=22) | <b>0.53</b><br>$\pm 0.26$<br>(n=17)                           | <b>0.54</b><br>$\pm 0.27$<br>(n=17) | <b>0.51</b><br>$\pm 0.28$<br>(n=17) | <b>0.52</b><br>$\pm 0.26$<br>(n=17) | <b>0.51</b><br>$\pm 0.28$<br>(n=17) | <b>0.53</b><br>$\pm 0.27$<br>(n=17) |
| NH <sub>4</sub> -N ( $\mu\text{g l}^{-1}$ ) | <b>4.4</b><br>$\pm 4.25$<br>(n=24)  | <b>4.38</b><br>$\pm 4.38$<br>(n=18)                           | <b>4.53</b><br>$\pm 5.93$<br>(n=18) | <b>3.56</b><br>$\pm 3.83$<br>(n=18) | <b>4.06</b><br>$\pm 5.04$<br>(n=18) | <b>3.24</b><br>$\pm 3.61$<br>(n=18) | <b>4.02</b><br>$\pm 4.99$<br>(n=18) |
| DOC (mg l <sup>-1</sup> )                   | <b>1.49</b><br>$\pm 0.52$<br>(n=39) | <b>1.2</b><br>$\pm 0.37$<br>(n=29)                            | <b>1.22</b><br>$\pm 0.35$<br>(n=32) | <b>1.29</b><br>$\pm 0.35$<br>(n=31) | <b>1.18</b><br>$\pm 0.34$<br>(n=30) | <b>1.28</b><br>$\pm 0.38$<br>(n=27) | <b>1.19</b><br>$\pm 0.36$<br>(n=33) |
| Temp. (°C)                                  | <b>9.06</b><br>$\pm 1.31$           | <b>9.3</b><br>$\pm 1.37$                                      | <b>9.27</b><br>$\pm 1.34$           | <b>9.26</b><br>$\pm 1.36$           | <b>9.29</b><br>$\pm 1.34$           | <b>9.29</b><br>$\pm 1.35$           | <b>9.3</b><br>$\pm 1.35$            |
