# Supplementary material for: Physical Heterogeneity Increases Biofilm Resource Use and Its Molecular Diversity in Stream Mesocosms
Source: PubMed Central journal article supplement (PMC2848676; doi:10.1371/journal.pone.0009988), 2010-04-01
Supplement: pone.0009988.s007.pdf [file pone.0009988.s007.pdf]

**Table S3. Metavariable dissimilarity (distance) matrices and underlying variables.** All matrices are Euclidean distance matrices calculated on standardised variables unless stated otherwise, see Methods for full description of abbreviated variables.

| distance matrix                                                               | used variables                                                                                                                                                                                                                                                                     | comments                                                                                                                                                                                                                          |
|-------------------------------------------------------------------------------|------------------------------------------------------------------------------------------------------------------------------------------------------------------------------------------------------------------------------------------------------------------------------------|-----------------------------------------------------------------------------------------------------------------------------------------------------------------------------------------------------------------------------------|
| <b>HET</b><br>(flow heterogeneity)                                            | Standard deviations of $R_{xyz}$ , $depth$ , $TKE$ and $TI$                                                                                                                                                                                                                        | Describes similarity in spatial variation of environmental key variables.                                                                                                                                                         |
| <b>COMMCOMP</b><br>(community composition)                                    | Relative peak heights of OTUs from T-RFLP                                                                                                                                                                                                                                          | Bray-Curtis distance matrices for individual sampling dates, rescaled by division through average distance to centroid and averaged to 1 matrix describing similarity in community composition at level of mesocosm ( $\gamma$ ). |
| <b>BETA</b><br>( $\beta$ -diversity)                                          | Average Bray-Curtis distance among microhabitats within flumes; average effective number of distinct communities for Hill-exponents $q=1$ and $q=2$ : ${}^{q=1}D_{\beta}$ and ${}^{q=2}D_{\beta}$                                                                                  | 3 non-redundant $\beta$ -diversity measures combined to describe similarity in diversity among microhabitats; i.e. the number of local communities within mesocosms.                                                              |
| <b>GAMMA</b><br>( $\gamma$ -diversity)                                        | Number equivalents of richness, Shannon-entropy and Gini-Simpson coefficient for whole mesocosms: ${}^{q=0}D_{\gamma}$ ; ${}^{q=1}D_{\gamma}$ ; ${}^{q=2}D_{\gamma}$ .                                                                                                             | 3 non-redundant $\gamma$ -diversity measures combined to describe similarity in diversity at level of mesocosms.                                                                                                                  |
| <b>GAMMA-E</b><br>(evenness at $\gamma$ -level)                               | Hill-evenness for Hill-exponents $q=1$ and $q=2$ : ${}^{q=1;0}E$ and ${}^{q=2;0}E$ ; Shannon-evenness after Pielou (1969): $\ln({}^{q=1}D)/\ln(S)$                                                                                                                                 | 3 non-redundant measures combined to describe similarity in evenness-component of $\gamma$ -diversity.                                                                                                                            |
| <b>STRUCDIV</b><br>(biofilm structural diversity)                             | Coefficient of variation of bacterial density and chlorophyll-a (within flumes)                                                                                                                                                                                                    | Describes similarity in spatial variation of biomass-associated structural / micro-architectural variables of biofilms.                                                                                                           |
| <b>CHLA</b><br>(primary producer biomass)                                     | Average chlorophyll-a at mesocosm level                                                                                                                                                                                                                                            | Describes similarity in biomass of primary producers and the potential release of exudates as an available substrate for heterotrophs.                                                                                            |
| <b>DOCUSE</b><br>(DOC resource use distribution)                              | Normalized mass transfer coefficients of 361 DOC compounds                                                                                                                                                                                                                         | Describes similarity in consumption patterns of DOC compounds common to all flumes (Figure 2a).                                                                                                                                   |
| <b>DOCDIV</b><br>(DOC resource use diversity and dependence from constraints) | Diversity of DOC-composition: $H'_{DOC}$ ; standard deviation of 361 mass transfer coefficients per flume: $SD_{v_i}$ ; unstandardised slopes $b_1$ and $b_2$ and the coefficient of determination $R^2$ of a linear regression model predicting $v_i$ from $r_{inflow}$ and $N$ . | Describes similarity in resource use diversity and dependence from controlling factors inflow availability and presence of nitrogen.                                                                                              |
| <b>DOCMT</b><br>(DOC mass transfer)                                           | Bulk DOC mass transfer coefficients                                                                                                                                                                                                                                                | Describes similarity in bulk DOC dynamics (uptake velocity).                                                                                                                                                                      |
| <b>GLCMT</b><br>(glucose mass transfer)                                       | Glucose mass transfer coefficients                                                                                                                                                                                                                                                 | Describes similarity in glucose dynamics (uptake velocity).                                                                                                                                                                       |
