# Supplementary material for: Physical Heterogeneity Increases Biofilm Resource Use and Its Molecular Diversity in Stream Mesocosms
Source: PubMed Central journal article supplement (PMC2848676; doi:10.1371/journal.pone.0009988), 2010-04-01
Supplement: pone.0009988.s008.pdf [file pone.0009988.s008.pdf]

**Table S4. Results of hierarchical partitioning analysis of DOC compound-specific characteristics as predictors for mass transfer to the streambed.** Given are percentage independent contributions applicable to each single variable as predictor of compound-specific mass transfer coefficients (n=276). The sum of independent contributions corresponds to R<sup>2</sup> of the full model (given in the last line). Predictor variables are: In-transformed relative peak intensity in the inflow ( $rI_{\text{inflow}}$ ), aromaticity index ( $AI$ ), indication of aromatic structures ( $AI>0.5$ ), ratio of oxygen to carbon atoms ( $O:C$ ), ratio of hydrogen to carbon atoms ( $H:C$ ), presence of nitrogen ( $N$ ), molecule size ( $m/z$ ). Significance was tested using 500 random permutations of values of each variable and calculating critical percentiles of distributions of randomized independent contributions (\*\*\*...P<0.001, \*\*...P<0.01, \*...P<0.05, <sup>ns</sup>...non-significant). Subsets of predictor variables identified by the Akaike and Schwarz Bayesian Information Criteria to define the most parsimonious model are marked by <sup>AIC</sup> and <sup>BIC</sup>.

| Height of bedforms in the mesocosms – flow heterogeneity treatment |                            |                            |                            |                            |                            |                            |
|--------------------------------------------------------------------|----------------------------|----------------------------|----------------------------|----------------------------|----------------------------|----------------------------|
|                                                                    | no bedforms                | 2 cm                       | 4 cm                       | 6 cm                       | 8 cm                       | 10 cm                      |
| $rI_{\text{inflow}}$                                               | 43.2 <sup>***BIC,AIC</sup> | 60.2 <sup>***BIC,AIC</sup> | 65.1 <sup>***BIC,AIC</sup> | 33.4 <sup>***BIC,AIC</sup> | 63.7 <sup>***BIC,AIC</sup> | 45.5 <sup>***BIC,AIC</sup> |
| $O:C$                                                              | 30.7 <sup>***BIC,AIC</sup> | 17.1 <sup>***BIC,AIC</sup> | 12.7 <sup>***BIC,AIC</sup> | 30.9 <sup>***BIC,AIC</sup> | 10.6 <sup>**BIC,AIC</sup>  | 22.3 <sup>***BIC,AIC</sup> |
| $H:C$                                                              | 9.1 <sup>***AIC</sup>      | 8.4 <sup>**</sup>          | 6.3 <sup>**</sup>          | 24.9 <sup>***BIC,AIC</sup> | 11.1 <sup>**AIC</sup>      | 18.3 <sup>***BIC,AIC</sup> |
| $AI>0.5$                                                           | 8.4 <sup>***BIC,AIC</sup>  | 9.1 <sup>**BIC,AIC</sup>   | 8.1 <sup>**BIC,AIC</sup>   | 6.8 <sup>**AIC</sup>       | 11.2 <sup>**BIC,AIC</sup>  | 10.1 <sup>**AIC</sup>      |
| $m/z$                                                              | 5.5 <sup>**AIC</sup>       | 0.7 <sup>ns</sup>          | 2.7 <sup>ns</sup>          | 0.6 <sup>ns</sup>          | 0.8 <sup>ns</sup>          | 1.2 <sup>ns</sup>          |
| $AI$                                                               | 2.1 <sup>ns</sup>          | 2.4 <sup>ns</sup>          | 2.4 <sup>ns</sup>          | 2.7 <sup>ns</sup>          | 1.5 <sup>ns</sup>          | 1.9 <sup>ns</sup>          |
| $N$                                                                | 1.1 <sup>ns</sup>          | 2.2 <sup>ns</sup>          | 2.7 <sup>ns</sup>          | 0.7 <sup>ns</sup>          | 1.1 <sup>ns</sup>          | 0.7 <sup>ns</sup>          |
| R <sup>2</sup>                                                     | 0.48                       | 0.31                       | 0.38                       | 0.44                       | 0.27                       | 0.26                       |
