# Supplementary material for: Physical Heterogeneity Increases Biofilm Resource Use and Its Molecular Diversity in Stream Mesocosms
Source: PubMed Central journal article supplement (PMC2848676; doi:10.1371/journal.pone.0009988), 2010-04-01
Supplement: pone.0009988.s010.pdf [file pone.0009988.s010.pdf]

**Table S6. Results of flume level ( $\gamma$ ) biodiversity partitioning into independent orthogonal components  $\alpha$  and  $\beta$ , or richness and evenness.** The table gives slopes  $b_1$ , coefficients of determination ( $r^2$ ) and significance levels of linear models of diversity measures on flow heterogeneity ( $SD_{Rxyz}$ ).  $\gamma$ -,  $\alpha$ -,  $\beta$ -diversity and Hill-evenness were computed for Hill exponents  $q = 1$  (i.e., all OTU's equally weighed by their frequency) and  $q = 2$  (i.e., index is disproportionately sensitive towards common OTU's). Computations for  $q = 0$  (i.e., index is maximally sensitive towards rare OTU's) are equivalent to richness. All diversity indices except Pielou's evenness and mean Bray-Curtis dissimilarity were expressed as numbers equivalents. Full and reduced (red.) set refer to use of all OTUs detected by TRFLP-fingerprinting (full set) or conservative reanalysis using a reduced dataset limited to taxa found at all microhabitats (=samples) at each date which effectively limits the analysis to an investigation of evenness differences. All data standardised and pooled from 4 sampling dates, total sample size = 16 per flume, significant relationships printed bold.

|                                                         | Hill exponent $q = 1$<br>Shannon entropy                                        | Hill exponent $q = 2$<br>Gini-Simpson coefficient                               |
|---------------------------------------------------------|---------------------------------------------------------------------------------|---------------------------------------------------------------------------------|
| $\gamma$ -diversity, full set                           | $b_1 = +0.06, r^2 = 0.01$<br>$P = 0.62$                                         | $b_1 = +0.12, r^2 = 0.05$<br>$P = 0.32$                                         |
| $\gamma$ -diversity, red. set                           | $b_1 = +0.14, r^2 = 0.06$<br>$P = 0.35$                                         | $b_1 = +0.13, r^2 = 0.05$<br>$P = 0.36$                                         |
| $\alpha$ -diversity, full set                           | $b_1 = +0.07, r^2 = 0.01$<br>$P = 0.57$                                         | $b_1 = +0.12, r^2 = 0.05$<br>$P = 0.31$                                         |
| $\alpha$ -diversity, red. set                           | $b_1 = +0.07, r^2 = 0.01$<br>$P = 0.63$                                         | $b_1 = +0.08, r^2 = 0.02$<br>$P = 0.59$                                         |
| $\beta$ -diversity, full set                            | <b><math>b_1 = +0.31, r^2 = 0.30</math></b><br><b><math>P &lt; 0.01</math></b>  | <b><math>b_1 = +0.37, r^2 = 0.41</math></b><br><b><math>P &lt; 0.001</math></b> |
| $\beta$ -diversity, red. set                            | <b><math>b_1 = +0.45, r^2 = 0.63</math></b><br><b><math>P &lt; 0.001</math></b> | <b><math>b_1 = +0.46, r^2 = 0.64</math></b><br><b><math>P &lt; 0.001</math></b> |
| evenness (Hill) – full set                              | $b_1 = -0.02, r^2 = 0.001$<br>$P = 0.88$                                        | $b_1 = -0.06, r^2 = 0.01$<br>$P = 0.64$                                         |
| evenness (Hill) – red. set                              | same as $\gamma$ -diversity                                                     | same as $\gamma$ -diversity                                                     |
| richness (Hill exponent $q = 0$ )                       | $b_1 = +0.04, r^2 = 0.005$<br>$P = 0.74$                                        |                                                                                 |
| evenness (Pielou) – full set                            | $b_1 = +0.22, r^2 = 0.16$<br>$P = 0.06$                                         |                                                                                 |
| evenness (Pielou) – red. set                            | $b_1 = +0.14, r^2 = 0.06$<br>$P = 0.34$                                         |                                                                                 |
| mean Bray-Curtis<br>dissimilarity as $\beta$ -diversity | <b><math>b_1 = +0.41, r^2 = 0.53</math></b><br><b><math>P &lt; 0.001</math></b> |                                                                                 |
