# Supplementary material for: Physical Heterogeneity Increases Biofilm Resource Use and Its Molecular Diversity in Stream Mesocosms
Source: PubMed Central journal article supplement (PMC2848676; doi:10.1371/journal.pone.0009988), 2010-04-01
Supplement: pone.0009988.s011.pdf [file pone.0009988.s011.pdf]

**Table S7. Associations between metavariable dissimilarity matrices as expressed by Mantel statistics.** Mantel (upper diagonal) and partial Mantel (lower diagonal) statistics (controlling for flow heterogeneity), significant values printed bold, P-values not corrected for multiple testing, see Table S3 for variables used for calculation of dissimilarity matrices. Upper left subset of matrix is identical to matrix given in Table 1.

|                                                  | $\beta$ -diversity          | resource use distribution   | resource use diversity      | DOC mass transfer           | glucose mass transfer       | community composition       | structural diversity        | Chlorophyll-a               | $\gamma$ -diversity         | $\gamma$ -evenness |
|--------------------------------------------------|-----------------------------|-----------------------------|-----------------------------|-----------------------------|-----------------------------|-----------------------------|-----------------------------|-----------------------------|-----------------------------|--------------------|
| <b>flow heterogeneity</b><br>(HET)               | <b>.81</b><br><b>P=.007</b> | .38<br>P=.22                | <b>.48</b><br><b>P=.046</b> | <b>.55</b><br><b>P=.018</b> | <b>.94</b><br><b>P=.000</b> | .52<br>P=.07                | <b>.91</b><br><b>P=.000</b> | <b>.86</b><br><b>P=.004</b> | -.28<br>P=.71               | .09<br>P=.40       |
| <b><math>\beta</math>-diversity</b><br>(BETA)    |                             | <b>.61</b><br><b>P=.011</b> | <b>.83</b><br><b>P=.008</b> | <b>.73</b><br><b>P=.010</b> | <b>.86</b><br><b>P=.004</b> | .50<br>P=.06                | <b>.74</b><br><b>P=.015</b> | <b>.60</b><br><b>P=.032</b> | -.20<br>P=.67               | .14<br>P=.34       |
| <b>resource use distribution</b><br>(DOCUSE)     | <b>.55</b><br><b>P=.038</b> |                             | <b>.51</b><br><b>P=.017</b> | .21<br>P=.23                | .29<br>P=.18                | .23<br>P=.31                | .24<br>P=.24                | .00<br>P=.35                | -.41<br>P=.98               | .43<br>P=.16       |
| <b>resource use diversity</b><br>(DOCDIV)        | <b>.85</b><br><b>P=.007</b> | .40<br>P=.09                |                             | .54<br>P=.07                | <b>.59</b><br><b>P=.024</b> | .16<br>P=.26                | .40<br>P=.08                | .36<br>P=.09                | -.25<br>P=.75               | -.19<br>P=.73      |
| <b>DOC mass transfer</b><br>(EFDOCMT)            | .57<br>P=.05                | .01<br>P=.37                | .37<br>P=.12                |                             | <b>.67</b><br><b>P=.007</b> | <b>.68</b><br><b>P=.000</b> | <b>.75</b><br><b>P=.017</b> | .42<br>P=.07                | .26<br>P=.17                | .15<br>P=.24       |
| <b>glucose mass transfer</b><br>(EFGLCMT)        | <b>.50</b><br><b>P=.047</b> | -.21<br>P=.75               | .45<br>P=.09                | .53<br>P=.07                |                             | .47<br>P=.11                | <b>.90</b><br><b>P=.000</b> | <b>.88</b><br><b>P=.007</b> | -.20<br>P=.59               | -.03<br>P=.49      |
| <b>community composition</b><br>(COMMCOMP)       | .15<br>P=.33                | .04<br>P=.41                | -.12<br>P=.64               | <b>.55</b><br><b>P=.001</b> | -.06<br>P=.49               |                             | .37<br>P=.16                | -.52<br>P=.97               | <b>.83</b><br><b>P=.049</b> | .49<br>P=.16       |
| <b>structural diversity</b><br>(STRUCDIV)        | .03<br>P=.44                | -.25<br>P=.79               | -.10<br>P=.59               | <b>.72</b><br><b>P=.021</b> | .30<br>P=.15                | <b>.60</b><br><b>P=.024</b> |                             | <b>.81</b><br><b>P=.007</b> | -.12<br>P=.59               | .18<br>P=.29       |
| <b>Chlorophyll-a</b><br>(CHLA)                   | -.31<br>P=.79               | -.69<br>P=.96               | -.13<br>P=.63               | -.13<br>P=.66               | .40<br>P=.14                | .22<br>P=.30                | .14<br>P=.33                |                             | -.30<br>P=.80               | -.17<br>P=.62      |
| <b><math>\gamma</math>-diversity</b><br>(GAMMA)  | .05<br>P=.39                | -.34<br>P=.85               | -.14<br>P=.63               | <b>.52</b><br><b>P=.004</b> | .21<br>P=.24                | .53<br>P=.11                | .33<br>P=.20                | -.11<br>P=.51               |                             | .11<br>P=.41       |
| <b><math>\gamma</math>-evenness</b><br>(GAMMA-E) | .11<br>P=.38                | .43<br>P=.16                | -.27<br>P=.81               | .12<br>P=.28                | -.34<br>P=.77               | .47<br>P=.12                | .23<br>P=.25                | -.50<br>P=.89               | .14<br>P=.41                |                    |
